# Supplementary material
Source: Springer Nature journal article supplement (https://www.springermedizin.de/resource/supplementary/12903_2010_180_MOESM1_ESM.pdf/9516294)

# Proportion of examined adolescents who were cariesfree by age

◆ 13-15 Yr old    ■ 16-19 Yr old

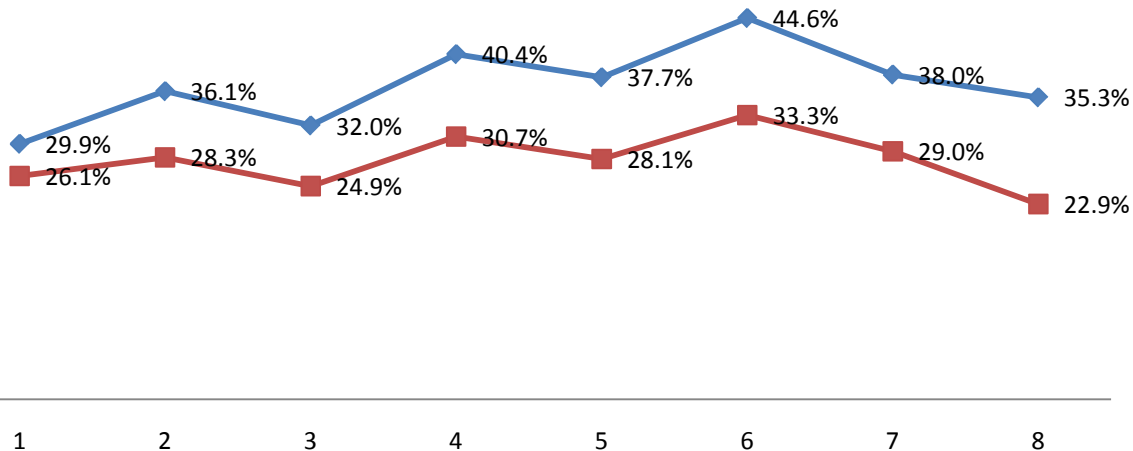

Supplement: MOESM1 [file 9516294]
